# Supplementary material for: Impact on Fecal Microbiota and Health-Related Markers of an Intervention Focused on Improving Eating Behavior in People at Risk of Food Insecurity
Source: MDPI journal article supplement (doi:10.3390/nu15163537), 2023-08-11
Supplement: s1 [file s1]

## Supplementary Material

**Table S1.** Anthropometric parameters at baseline and after the intervention according to the degree of compliance with the dietary intervention

|                             | LC<br>n=11            |                       | HC<br>n=6             |                        |
|-----------------------------|-----------------------|-----------------------|-----------------------|------------------------|
|                             | T0                    | T1                    | T0                    | T1                     |
| Weight (Kg)                 | 85.00 (56.60 - 92.60) | 86.00 (56.80 - 94.40) | 69.70 (59.20 - 85.40) | 69.00 (58.40 - 86.00)  |
| BMI (Kg/m <sup>2</sup> )    | 30.18 (20.79 - 36.17) | 30.11 (21.41 - 36.93) | 25.58 (22.56 - 33.78) | 25.65 (22.81 - 37.72)  |
| Underweight ( $\leq 18.5$ ) | 1 (9)                 | 0 (0)                 | 0 (0)                 | 0 (0)                  |
| Normal weight (18.5–24.9)   | 2 (18)                | 3 (27)                | 3 (50)                | 3 (50)                 |
| Overweight (25.0–29.9)      | 2 (18)                | 2 (18)                | 1 (17)                | 1 (17)                 |
| Obese ( $\geq 30.0$ )       | 6 (55)                | 6 (55)                | 2 (33)                | 2 (33)                 |
| Total body fat              | 9 (82)                | 9 (82)                | 6 (100)               | 6 (100)                |
| (%)                         | 46.00 (29.00 - 58.00) | 45.00 (28.00 - 57.00) | 32.00 (27.00 - 49.00) | 34.50 (31.00 - 58.00)* |
| WHR                         | 7 (64)                | 7 (64)                | 6 (100)               | 6 (100)                |
|                             | 0.85 (0.80 - 0.91)    | 0.81 (0.78 - 0.83)    | 0.86 (0.83 - 0.95)    | 0.88 (0.86 - 0.91)†    |

Data is expressed as median (P<sub>25</sub> – P<sub>75</sub>) and n (%). Statistical differences were found by Wilcoxon or Mc Nemar test (\*) for continuous and categorical variables within each group (T0 vs. T1) and by Mann-Whitney U and Fisher test (†) for comparisons in-between (T0 vs. T0 and T1 vs. T1) (p value < 0.05). LC, lower compliance; HC, higher compliance; T0, baseline; T1, end; WHR, waist-hip ratio.

**Table S2.** Biochemical parameters at baseline and after the intervention according to the degree of compliance with the dietary intervention

| (mg/dl)           | LC<br>n=11     |                | HC<br>n=6      |                |
|-------------------|----------------|----------------|----------------|----------------|
|                   | T0             | T1             | T0             | T1             |
| Glucose           | 89.09 ± 5.82   | 92.60 ± 13.98  | 88.17 ± 13.63  | 90.00 ± 5.93   |
| Total cholesterol | 195.36 ± 28.54 | 188.70 ± 43.27 | 228.67 ± 44.97 | 229.83 ± 43.13 |
| HDL               | 52.45 ± 16.49  | 53.50 ± 16.06  | 64.17 ± 14.16  | 63.00 ± 17.27  |
| LDL               | 115.18 ± 21.38 | 108.20 ± 24.89 | 142.00 ± 38.30 | 141.33 ± 31.91 |
| Triglycerides     | 138.91 ± 83.38 | 135.50 ± 94.81 | 112.33 ± 27.78 | 127.83 ± 45.74 |
| Uric acid         | 4.55 ± 1.04    | 4.32 ± 0.91    | 4.37 ± 1.26    | 4.30 ± 1.06    |
| Creatinine        | 0.70 ± 0.11    | 0.73 ± 0.16    | 0.64 ± 0.13    | 0.68 ± 0.16    |
| Iron (µg/dl)      | 80.09 ± 39.36  | 66.90 ± 27.31  | 82.67 ± 24.81  | 89.67 ± 28.38  |

Data is expressed as mean ± sd. HC, higher compliance; HDL, high-density lipoprotein; LC, lower compliance; LDL, low-density lipoprotein; T0, baseline; T1, end.

**Table S3.** Beck Depression Inventory-II (BDI-II) categories of depressive symptoms and total score at baseline and after the intervention according to the degree of compliance with the dietary intervention

|                       | LC<br>n=11   |             | HC<br>n=6   |             |
|-----------------------|--------------|-------------|-------------|-------------|
|                       | T0           | T1          | T0          | T1          |
| <b>Categories</b>     |              |             |             |             |
| Minimal ( $\leq 13$ ) | 4 (36)       | 8 (73)      | 2 (33)      | 4 (67)      |
| Mild (14 - 19)        | 5 (45)       | 2 (18)      | 2 (33)      | 0 (0)       |
| Moderate (20 - 28)    | 1 (9)        | 0 (0)       | 0 (0)       | 1 (17)      |
| Severe ( $\geq 29$ )  | 1 (9)        | 1 (9)       | 2 (33)      | 1 (17)      |
| <b>Total score</b>    | 14 (11 - 18) | 9 (4 - 14)* | 18 (8 - 37) | 11 (2 - 26) |

Data is expressed as median ( $P_{25} - P_{75}$ ) and n (%). (\*) Statistical differences were found by Wilcoxon or Mc Nemar test (p value < 0.05). HC, higher compliance; LC, lower compliance; T0, baseline; T1, end.

**Table S4.** Sensitivity thresholds and discrimination scores for salt and sweet at baseline and after the intervention according to the degree of compliance with the dietary intervention.

|                               | LC<br>n=8            |                       | HC<br>n=6             |                       |
|-------------------------------|----------------------|-----------------------|-----------------------|-----------------------|
|                               | T0                   | T1                    | T0                    | T1                    |
| <b>Sensitivity (mM)</b>       |                      |                       |                       |                       |
| Salt                          | 10.00 (7.50 - 15.00) | 10.00 (5.00 - 12.50)  | 12.50 (10.00 - 50.00) | 10.00 (10.00 - 10.00) |
| Sweet                         | 15.00 (5.00 - 30.00) | 15.00 (10.00 - 22.50) | 15.00 (15.00 - 15.00) | 15.00 (5.00 - 15.00)  |
| <b>Discrimination (score)</b> |                      |                       |                       |                       |
| Salt                          | 3.00 (2.50 - 3.50)   | 3.50 (2.50 - 4.50)    | 2.00 (2.00 - 2.00)†   | 3.50 (3.00 - 4.00)    |
| Sweet                         | 3.00 (3.00 - 4.50)   | 4.00 (3.50 - 4.50)*   | 3.00 (2.00 - 4.00)    | 4.00 (2.00 - 5.00)    |

Data is expressed as median (P<sub>25</sub> – P<sub>75</sub>). Statistical differences were found by Wilcoxon (\*) and Mann-Whitney U tests (†) for comparisons within each group (T0 vs. T1) and in-between (T0 vs. T0 and T1 vs. T1), respectively (*p* value < 0.05). HC, higher compliance; LC, lower compliance; T0, baseline; T1, end.

**Table S5.** Microbiota diversity indexes and relative abundance profile composition at baseline and after the intervention according to the degree of compliance with the dietary intervention.

|                         | LC<br>n=11      |                 | HC<br>n=6       |                |
|-------------------------|-----------------|-----------------|-----------------|----------------|
|                         | T0              | T1              | T0              | T1             |
| <b>Diversity</b>        |                 |                 |                 |                |
| Observed species        | 711.64 ± 132.53 | 635.55 ± 142.26 | 800.33 ± 256.64 | 624.00 ± 93.88 |
| Shannon index           | 5.80 ± 0.80     | 6.13 ± 0.35     | 6.14 ± 0.63     | 5.85 ± 0.34    |
| <b>Taxa (%)</b>         |                 |                 |                 |                |
| Bacillota               | 51.33 ± 11.45   | 60.86 ± 8.44*   | 48.38 ± 9.70    | 55.80 ± 9.02   |
| Ruminococcaceae         | 11.70 ± 3.12    | 12.53 ± 3.07    | 11.12 ± 2.92    | 13.72 ± 2.13*  |
| Oscillospiraceae        | 2.46 ± 1.31     | 3.42 ± 1.19*    | 2.69 ± 0.71     | 2.21 ± 0.73†   |
| Clostridia_UCG-014      | 1.79 ± 1.61     | 0.71 ± 0.35*    | 0.60 ± 0.25†    | 0.64 ± 0.30    |
| Actinomycetota          | 30.88 ± 14.75   | 23.93 ± 6.94    | 27.13 ± 12.51   | 16.56 ± 9.51*  |
| Bifidobacteriaceae      | 17.08 ± 15.86   | 10.10 ± 6.46    | 12.16 ± 11.65   | 6.99 ± 7.57*   |
| <i>Bifidobacterium</i>  | 17.08 ± 15.86   | 10.10 ± 6.46    | 12.16 ± 11.65   | 6.99 ± 7.57*   |
| Coriobacteriaceae       | 8.93 ± 5.00     | 9.08 ± 4.87     | 8.88 ± 7.33     | 5.02 ± 3.19*   |
| <i>Senegalimassilia</i> | 1.60 ± 1.25     | 1.17 ± 0.39     | 1.88 ± 1.12     | 1.02 ± 0.77*   |
| <i>Collinsella</i>      | 8.76 ± 5.00     | 8.97 ± 4.95     | 8.24 ± 7.54     | 4.38 ± 3.47*†  |
| Eggerthellaceae         | 3.99 ± 2.10     | 3.66 ± 1.07     | 5.11 ± 2.13     | 3.55 ± 1.94*   |
| <i>Slackia</i>          | 1.02 ± 0.71     | 1.03 ± 0.63     | 1.96 ± 1.28†    | 1.23 ± 0.99*   |
| Bacteroidota            | 15.81 ± 9.41    | 13.05 ± 6.09    | 20.76 ± 4.10    | 25.01 ± 14.40  |
| Prevotellaceae          | 10.90 ± 7.95    | 4.83 ± 2.71*    | 12.15 ± 4.73    | 19.67 ± 16.58  |
| <i>Prevotella</i>       | 10.18 ± 7.64    | 4.25 ± 2.55*    | 11.24 ± 4.52    | 17.95 ± 15.24  |
| UCG-002                 | 1.28 ± 0.81     | 1.82 ± 0.91*    | 1.26 ± 0.39     | 1.20 ± 0.43    |

Data is expressed as mean ± sd. Statistical differences were found by Wilcoxon (\*) and Mann-Whitney U tests (†) for comparisons within each group (T0 vs. T1) and in-between (T0 vs. T0 and T1 vs. T1), respectively (p value < 0.05). Only taxa with greater relative abundance than 1% in at least two samples showing significant changes after the intervention were considered in the analysis. LC, lower compliance; HC, higher compliance; T0, baseline; T1, end.

**Table S6.** Microbiota diversity indexes and relative abundance profile composition at baseline and after the intervention in those individuals with LC showing amelioration of depressive symptoms after the intervention.

|                                            | T0<br>n=7       | T1<br>n=7       |
|--------------------------------------------|-----------------|-----------------|
| <b>Diversity</b>                           |                 |                 |
| Observed species                           | 5.69 ± 0.89     | 6.05 ± 0.40     |
| Shannon index                              | 694.71 ± 123.01 | 679.29 ± 169.79 |
| <b>Taxa (%)</b>                            |                 |                 |
| Bacillota                                  | 51.42 ± 11.23   | 58.90 ± 8.32    |
| Lachnospiraceae                            | 19.59 ± 5.37    | 21.48 ± 3.37    |
| <i>Agathobacter</i>                        | 5.71 ± 2.46     | 5.90 ± 1.96     |
| <i>Blautia</i>                             | 3.47 ± 1.39     | 4.02 ± 1.74     |
| <i>Dorea</i>                               | 1.30 ± 0.46     | 1.54 ± 0.28     |
| <i>Ruminococcus torques</i> group          | 1.07 ± 0.57     | 1.21 ± 0.38     |
| Veillonellaceae                            | 3.41 ± 2.29     | 2.80 ± 2.05     |
| <i>Dialister</i>                           | 2.00 ± 1.50     | 1.96 ± 2.20     |
| <i>Megasphaera</i>                         | 1.34 ± 2.20     | 0.74 ± 1.01     |
| Oscillospiraceae                           | 2.31 ± 1.44     | 3.47 ± 1.42*    |
| <i>Faecalibacterium</i>                    | 4.73 ± 2.02     | 4.95 ± 2.31     |
| <i>Subdoligranulum</i>                     | 3.41 ± 0.46     | 3.89 ± 1.22     |
| Peptostreptococcaceae                      | 2.15 ± 1.08     | 1.85 ± 1.27     |
| <i>Romboutsia</i>                          | 1.69 ± 0.80     | 1.22 ± 0.78     |
| Coprobacillaceae                           |                 |                 |
| <i>Catenibacterium</i>                     | 3.30 ± 2.85     | 4.80 ± 4.53     |
| Streptococcaceae                           | 2.12 ± 2.37     | 4.58 ± 3.54     |
| <i>Streptococcus</i>                       | 2.12 ± 2.38     | 4.57 ± 3.54     |
| Clostridia_UCG-014                         | 1.52 ± 1.03     | 0.81 ± 0.40     |
| Eubacteriaceae                             |                 |                 |
| <i>Eubacterium coprostanoligenes</i> group | 1.27 ± 0.39     | 1.66 ± 0.56     |
| Lachnospiraceae NK4A136 group              | 1.31 ± 0.96     | 1.10 ± 0.92     |
| Erysipelotrichaceae                        | 1.10 ± 0.67     | 1.76 ± 0.91     |
| <i>Holdemanella</i>                        | 0.86 ± 0.60     | 1.52 ± 0.91     |
| Actinobacteriota                           | 30.59 ± 17.21   | 26.25 ± 6.28    |
| Coriobacteriaceae                          | 9.18 ± 6.31     | 10.65 ± 5.36    |
| <i>Collinsella</i>                         | 8.98 ± 6.30     | 10.63 ± 5.35    |
| <i>Senegalimassilia</i>                    | 1.87 ± 1.53     | 1.08 ± 0.30     |
| Bacteroidota                               | 16.10 ± 11.40   | 12.83 ± 7.25    |
| Bifidobacteriaceae                         | 16.43 ± 17.76   | 11.04 ± 7.06    |
| <i>Bifidobacterium</i>                     | 16.42 ± 17.76   | 11.04 ± 7.06    |
| Prevotellaceae                             | 11.76 ± 9.70    | 4.20 ± 1.83     |
| <i>Prevotella</i>                          | 11.21 ± 9.39    | 3.68 ± 1.80     |
| Ruminococcaceae                            | 11.59 ± 2.61    | 11.91 ± 3.58    |
| <i>Eggerthellaceae</i>                     | 4.15 ± 2.55     | 3.38 ± 0.65     |
| Erysipelatoclostridiaceae                  | 3.69 ± 2.87     | 5.00 ± 4.51     |
| Bacteroidaceae                             | 3.08 ± 1.12     | 6.50 ± 6.07     |
| <i>Bacteroides</i>                         | 3.08 ± 1.12     | 6.50 ± 6.07     |

Data is expressed as mean ± sd. Statistical differences were found by Wilcoxon (\*) for comparisons within each group (T0 vs. T1) (p value < 0.05). Only taxa with greater relative abundance than 1% in at least two samples were considered in the analysis. LC, lower compliance; HC, higher compliance; T0, baseline; T1, end.
